# Supplementary material for: Evaluating algorithmic fairness in the presence of clinical guidelines: the case of atherosclerotic cardiovascular disease risk estimation
Source: HighWire-hosted journal article supplement (doi:10.1136/bmjhci-2021-100460), 2022-04-01
Supplement: bmjhci-2021-100460supp002_data_supplement.pdf [file bmjhci-2021-100460supp002_data_supplement.pdf]

Foryciarz et al. 2021, Supplement B

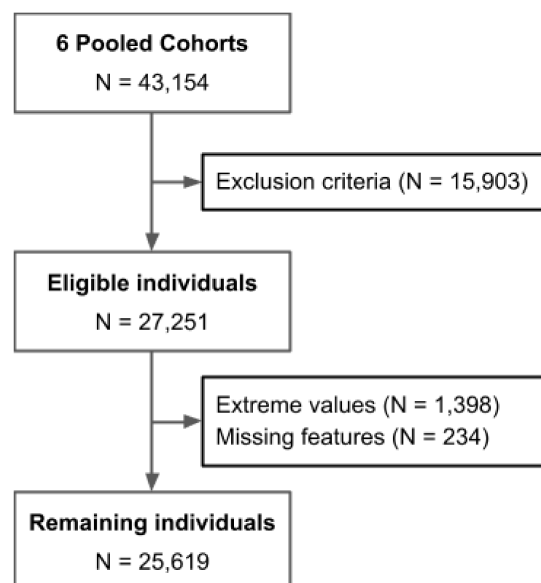

**Supplementary Figure B1. Cohort construction flowchart.** We excluded individuals younger than 40 or older than 79, those with past history of myocardial infarction, stroke, coronary bypass surgery or angioplasty, congestive heart failure or atrial fibrillation, and those who were receiving statins at the time of the initial exam. We removed records with extreme values of systolic blood pressure (outside 90-200 mmHg), total cholesterol and high-density lipoprotein cholesterol (outside 130-320 and 20-100 mg/dL, respectively) and those with missing features.

Foryciarz et al. 2021, Supplement B

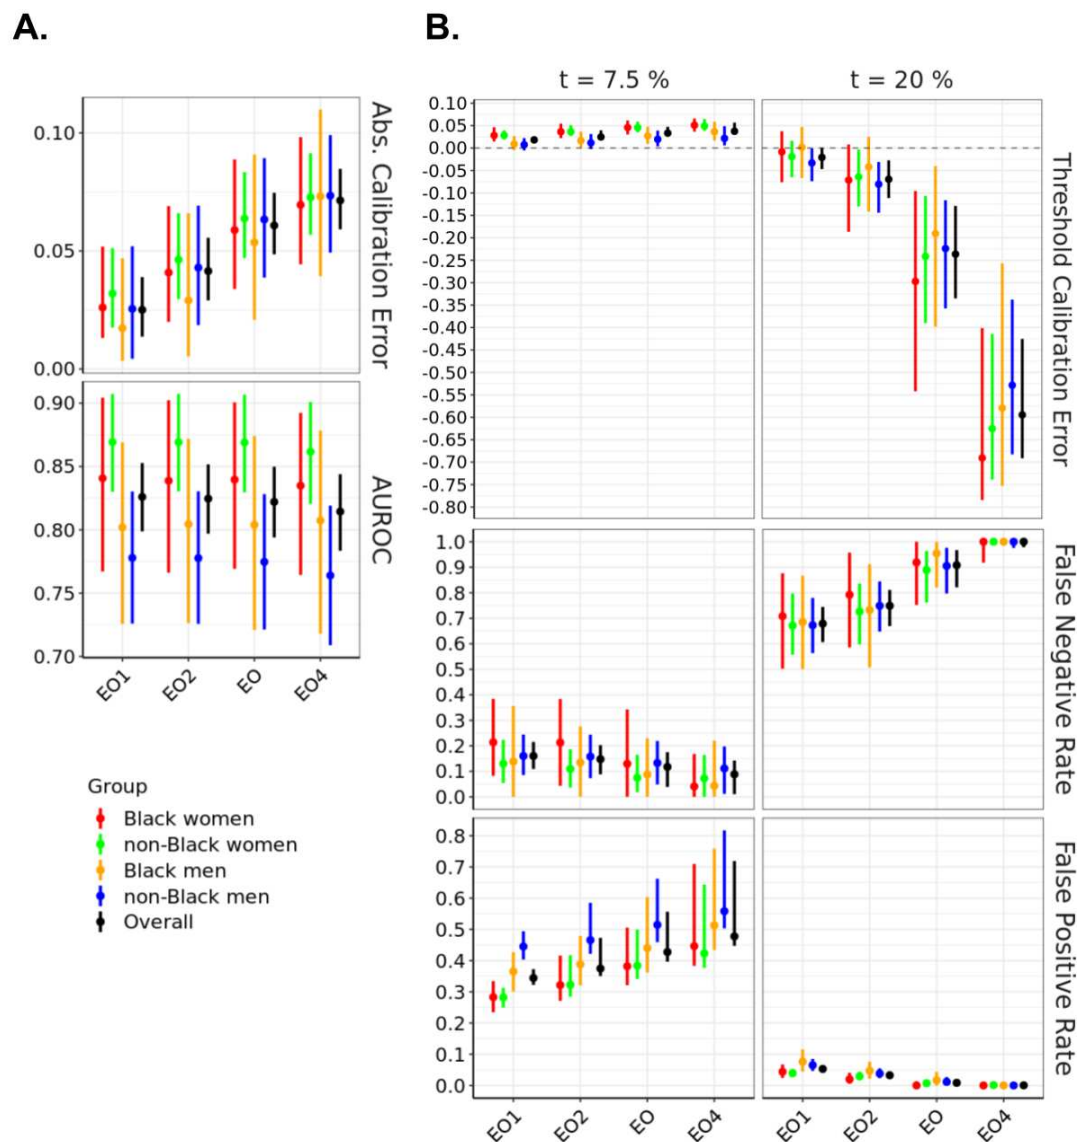

**Supplementary Figure B2. Performance of equalized odds models with different settings  $\lambda$ , stratified by demographic group, and evaluated on the held out test set.** EO1 - Equalized Odds ( $\lambda=0.1$ ), EO2 - Equalized Odds ( $\lambda=0.215$ ), EO - Equalized Odds ( $\lambda=0.464$ ), EO4 - Equalized Odds ( $\lambda=1$ ). The left panel shows AUROC and Absolute Calibration Error. The middle panel shows Threshold Calibration Error at two therapeutic thresholds (7.5% and 20%). The right panel shows False Negative and False Positive Rates at the two therapeutic thresholds.
